# Supplementary material for: Decision Criterion Dynamics in Animals Performing an Auditory Detection Task
Source: PubMed Central journal article supplement (PMC4259461; doi:10.1371/journal.pone.0114076), 2014-12-08
Supplement: pone.0114076.s002.pdf [file pone.0114076.s002.pdf]

# Supplementary Material S2:

## Ascending the Likelihood Function

### Likelihood Function

#### Probability of a Positive Response

The probability that the internal random decision variable  $X$  exceeds the threshold  $c_n$  on trial  $n$  depends on the current stimulus,  $h_n, \mu_n$ ; the sequences of stimuli and decisions that have preceded trial  $n$ ,  $\mathcal{H}_{n-1} = \{h_1, \dots, h_{n-1}, \mu_1, \dots, \mu_{n-1}\}$ ,  $\mathcal{D}_{n-1} = \{d_1, \dots, d_{n-1}\}$ ; and the set of model parameters,  $\Theta$ . We can abbreviate this probability using  $z_n$ , then write:

$$\begin{aligned} z_n &\equiv \Pr(X \geq c_n \mid \mathcal{H}_n, \mathcal{D}_{n-1}, \Theta) \\ &= \frac{1}{\sqrt{2\pi\sigma^2}} \int_{c_n}^{\infty} \exp\left[\frac{(x - \mu_n)^2}{-2\sigma^2}\right] dx \\ &= \frac{1}{\sqrt{2\pi\sigma^2}} \int_0^{\infty} \exp\left[\frac{(x + c_n - \mu_n)^2}{-2\sigma^2}\right] dx. \end{aligned}$$

The probability of a positive response (“yes”) is based on  $z_n$ , but incorporates the possibility of a lapse. For this we write

$$\begin{aligned} y_n &\equiv \Pr(D_n = 1 \mid \mathcal{H}_n, \mathcal{D}_{n-1}, \Theta) \\ &= \frac{\lambda}{2} + (1 - \lambda)z_n. \end{aligned}$$

#### Log-likelihood Function

We define the log-likelihood  $l_n$  of a decision  $d_n$  as the natural logarithm of its conditional probability, which in turn depends on the probability of a positive response:

$$\begin{aligned} l_n &\equiv \ln \Pr(D_n = d_n \mid \mathcal{H}_n, \mathcal{D}_{n-1}, \Theta) \\ &= \ln[d_n y_n + (1 - d_n)(1 - y_n)] \end{aligned}$$

The log-likelihood of a decision sequence is then simply the sum of the log-likelihoods of the individual decisions, that is,  $\Lambda_n = \sum_{n=1}^N l_n$ . Finding the maximum likelihood parameters can be achieved by ascending the gradient of  $\Lambda_n$ ,

$$\nabla_{\Theta} \Lambda_n = \sum_{n=1}^N \nabla_{\Theta} l_n = \sum_{n=1}^N \frac{(2d_n - 1) \nabla_{\Theta} y_n}{d_n y_n + (1 - d_n)(1 - y_n)}.$$

Note that the gradient of the log-likelihood function can be expressed in terms of the gradient of the probability of a positive response,  $\nabla_{\Theta} y_n$ .

## Partial Derivatives of the Likelihood Function

We now consider the partial derivatives with respect to eight parameters that form the components of the gradient  $\nabla_{\Theta} y_n$ , namely, those with respect to  $b_{00}$ ,  $b_{01}$ ,  $b_{10}$ ,  $b_{11}$ ,  $\sigma$ ,  $a$ ,  $c_1$  and  $\lambda$ .

### Derivative with respect to Shifts ( $b_{ij}$ )

The derivative of the probability of a positive response with respect to one of the shift parameters,  $b_{ij}$ , is given by

$$\begin{aligned} \frac{\partial y_n}{\partial b_{ij}} &= \frac{1 - \lambda}{\sqrt{2\pi\sigma^2}} \int_0^{\infty} \frac{\partial}{\partial b_{ij}} \exp\left[\frac{(x + c_n - \mu_n)^2}{-2\sigma^2}\right] dx \\ &= -\frac{1 - \lambda}{\sqrt{2\pi\sigma^2}} \frac{\partial c_n}{\partial b_{ij}} \int_0^{\infty} \frac{(x + c_n - \mu_n)}{\sigma^2} \exp\left[\frac{(x + c_n - \mu_n)^2}{-2\sigma^2}\right] dx \\ &= -\frac{\partial c_n}{\partial b_{ij}} \frac{1 - \lambda}{\sqrt{2\pi\sigma^2}} \exp\left[\frac{(c_n - \mu_n)^2}{-2\sigma^2}\right]. \end{aligned}$$

The derivative of the criterion,  $c_n$ , with respect to the shift parameter,  $b_{ij}$ , takes the form of a first-order linear filter applied to the indicator function  $r_n^{ij}$ :

$$\frac{\partial c_n}{\partial b_{ij}} = (1 - a) \frac{\partial c_{n-1}}{\partial b_{ij}} + \frac{\partial}{\partial b_{ij}} \{ac_0\} + \frac{\partial}{\partial b_{ij}} \left\{ \sum_{i,j} r_{n-1}^{ij} b_{ij} \right\}$$

$$= (1 - a) \frac{\partial c_{n-1}}{\partial b_{ij}} + r_{n-1}^{ij},$$

where  $\frac{\partial c_1}{\partial b_{ij}} = 0$ .

### Derivative with respect to Standard Deviation ( $\sigma$ )

The derivative of the probability of a positive response with respect to the standard deviation parameter,  $\sigma$ , is given by

$$\begin{aligned} \frac{\partial y_n}{\partial \sigma} &= \frac{\partial}{\partial \sigma} \frac{1 - \lambda}{\sqrt{2\pi\sigma^2}} \int_0^\infty \exp\left[\frac{(x + c_n - \mu_n)^2}{-2\sigma^2}\right] dx \\ &= -\frac{z_n(1 - \lambda)}{\sigma} - \frac{2(1 - \lambda)}{\sigma\sqrt{2\pi\sigma^2}} \int_0^\infty \frac{(x + c_n - \mu_n)^2}{-2\sigma^2} \exp\left[\frac{(x + c_n - \mu_n)^2}{-2\sigma^2}\right] dx \\ &= \frac{1 - \lambda}{\sqrt{2\pi\sigma^4}} (c_n - \mu_n) \exp\left[\frac{(c_n - \mu_n)^2}{-2\sigma^2}\right]. \end{aligned}$$

### Derivative with respect to Decay ( $a$ )

The derivative of the probability of a positive response with respect to the decay parameter,  $a$ , is given by

$$\begin{aligned} \frac{\partial y_n}{\partial a} &= \frac{1 - \lambda}{\sqrt{2\pi\sigma^2}} \int_0^\infty \frac{\partial}{\partial a} \exp\left[\frac{(x + c_n - \mu_n)^2}{-2\sigma^2}\right] dx \\ &= \frac{\partial c_n}{\partial a} \frac{2(1 - \lambda)}{\sqrt{2\pi\sigma^2}} \int_0^\infty \frac{(x + c_n - \mu_n)}{-2\sigma^2} \exp\left[\frac{(x + c_n - \mu_n)^2}{-2\sigma^2}\right] dx \\ &= -\frac{\partial c_n}{\partial a} \frac{1 - \lambda}{\sqrt{2\pi\sigma^2}} \exp\left[\frac{(c_n - \mu_n)^2}{-2\sigma^2}\right]. \end{aligned}$$

The derivative of the criterion,  $c_n$ , with respect to the decay parameter,  $a$ , is then:

$$\frac{\partial c_n}{\partial a} = \frac{\partial}{\partial a} \{(1 - a)c_{n-1}\} + \frac{\partial}{\partial a} \{ac_1\} + \frac{\partial}{\partial a} \left\{ \sum_{i,j} r_{n-1}^{ij} b_{ij} \right\}$$

$$= (1 - a) \frac{\partial c_{n-1}}{\partial a} + c_1 - c_{n-1},$$

for  $n > 1$ , and  $\frac{\partial c_1}{\partial a} = 0$ .

### Derivative with respect to the Resting Criterion ( $c_1$ )

The derivative of the probability of a positive response with respect to the resting (and initial) criterion parameter,  $c_1$ , is given by

$$\begin{aligned} \frac{\partial y_n}{\partial c_1} &= \frac{1 - \lambda}{\sqrt{2\pi\sigma^2}} \int_0^\infty \frac{\partial}{\partial c_1} \exp\left[\frac{(x + c_n - \mu_n)^2}{-2\sigma^2}\right] dx \\ &= \frac{\partial c_n}{\partial c_1} \frac{2(1 - \lambda)}{\sqrt{2\pi\sigma^2}} \int_0^\infty \frac{(x + c_n - \mu_n)}{-2\sigma^2} \exp\left[\frac{(x + c_n - \mu_n)^2}{-2\sigma^2}\right] dx \\ &= -\frac{\partial c_n}{\partial c_1} \frac{1 - \lambda}{\sqrt{2\pi\sigma^2}} \exp\left[\frac{(c_n - \mu_n)^2}{-2\sigma^2}\right]. \end{aligned}$$

The derivative of the criterion  $c_n$  with respect to the resting criterion parameter ( $c_1$ ) is then

$$\begin{aligned} \frac{\partial c_n}{\partial c_1} &= \frac{\partial}{\partial c_1} \{(1 - a)c_{n-1}\} + \frac{\partial}{\partial c_1} \{ac_1\} + \frac{\partial}{\partial c_1} \left\{ \sum_{i,j} r_{n-1}^{ij} b_{ij} \right\} \\ &= (1 - a) \frac{\partial c_{n-1}}{\partial c_1} + a \\ &= 1, \end{aligned}$$

because  $\frac{\partial c_1}{\partial c_1} = 1$ .

### Derivative with respect to the Lapse Probability ( $\lambda$ )

The derivative of the probability of a positive response with respect to the lapse probability parameter,  $\lambda$ , is given by

$$\frac{\partial y_n}{\partial \lambda} = \frac{1}{2} - z_n.$$
